# Supplementary material for: The research agenda for trauma critical care
Source: Springer Nature journal article supplement (doi:10.1007/s00134-017-4895-9), 2017-07-29
Supplement: MOESM1 [file 13337232]

**eTable 1 Glossary**

*TBI* Traumatic brain injury

*DCR* Damage control resuscitation

*RCT* Randomized controlled trial

*GCS* Glasgow coma score

*CT-scan Computer tomography-scan*

*ICP* Intracranial pressure

*CPP* Cerebral perfuson pressure

*CSF* Cerebrospinal fluid

*PbtO2* Brain tissue oxygenation pressure

*DC* Decompressive craniectomy

*MRI*  Magnetic resonance imaging

*3T* 3 tesla

*DTI* Diffusion tensor imaging

*CER* comparative effectiveness research
